# Supplementary material for: Chronic activation of hexosamine biosynthesis in the heart triggers pathological cardiac remodeling
Source: PubMed Central journal article supplement (PMC7156663; doi:10.1038/s41467-020-15640-y), 2020-04-14
Supplement: 41467_2020_15640_MOESM2_ESM.pdf [file 41467_2020_15640_MOESM2_ESM.pdf]

## Reporting Summary

Nature Research wishes to improve the reproducibility of the work that we publish. This form provides structure for consistency and transparency in reporting. For further information on Nature Research policies, see [Authors & Referees](#) and the [Editorial Policy Checklist](#).

### Statistics

For all statistical analyses, confirm that the following items are present in the figure legend, table legend, main text, or Methods section.

n/a Confirmed

- The exact sample size ( $n$ ) for each experimental group/condition, given as a discrete number and unit of measurement
- A statement on whether measurements were taken from distinct samples or whether the same sample was measured repeatedly
- The statistical test(s) used AND whether they are one- or two-sided  
*Only common tests should be described solely by name; describe more complex techniques in the Methods section.*
- A description of all covariates tested
- A description of any assumptions or corrections, such as tests of normality and adjustment for multiple comparisons
- A full description of the statistical parameters including central tendency (e.g. means) or other basic estimates (e.g. regression coefficient) AND variation (e.g. standard deviation) or associated estimates of uncertainty (e.g. confidence intervals)
- For null hypothesis testing, the test statistic (e.g.  $F$ ,  $t$ ,  $r$ ) with confidence intervals, effect sizes, degrees of freedom and  $P$  value noted  
*Give  $P$  values as exact values whenever suitable.*
- For Bayesian analysis, information on the choice of priors and Markov chain Monte Carlo settings
- For hierarchical and complex designs, identification of the appropriate level for tests and full reporting of outcomes
- Estimates of effect sizes (e.g. Cohen's  $d$ , Pearson's  $r$ ), indicating how they were calculated

*Our web collection on [statistics for biologists](#) contains articles on many of the points above.*

### Software and code

Policy information about [availability of computer code](#)

Data collection

- 1) Roche LightCycler 480, software release 1.5.1.6.2 SP2, and Bio-Rad CFX96 (or 384) Realtime PCR system, CFX Maestro 1.1, for qPCR data acquisition.
- 2) Odyssey infrared imaging system, application software version 3.0, for Western blotting data collection.
- 3) VisualSonics, #Vevo 2100, MS400C probe, for echocardiography data acquisition.
- 4) Image J, 1.52P, for heart cardiomyocyte cross-sectional area and cultured cardiomyocyte cell surface area calculation.
- 5) Beckman scintillation counter, #LS5000TA, for radioactive  $^3\text{H}$ -leucine measurements.

Data analysis

Microsoft Excel 14.7.7. and Graphpad Prism 7.01, to generate graphs and conduct statistical analysis.

For manuscripts utilizing custom algorithms or software that are central to the research but not yet described in published literature, software must be made available to editors/reviewers. We strongly encourage code deposition in a community repository (e.g. GitHub). See the Nature Research [guidelines for submitting code & software](#) for further information.

### Data

Policy information about [availability of data](#)

All manuscripts must include a [data availability statement](#). This statement should provide the following information, where applicable:

- Accession codes, unique identifiers, or web links for publicly available datasets
- A list of figures that have associated raw data
- A description of any restrictions on data availability

All relevant data are available from the corresponding author upon reasonable request.

## Field-specific reporting

Please select the one below that is the best fit for your research. If you are not sure, read the appropriate sections before making your selection.

Life sciences       Behavioural & social sciences       Ecological, evolutionary & environmental sciences

For a reference copy of the document with all sections, see [nature.com/documents/nr-reporting-summary-flat.pdf](https://www.nature.com/documents/nr-reporting-summary-flat.pdf)

## Life sciences study design

All studies must disclose on these points even when the disclosure is negative.

|                 |                                                                                                                                                                                        |
|-----------------|----------------------------------------------------------------------------------------------------------------------------------------------------------------------------------------|
| Sample size     | No statistical method was used to pre-determine sample size. All sample size information is provided in the figure legends.                                                            |
| Data exclusions | No data were excluded from analysis.                                                                                                                                                   |
| Replication     | All attempts at replication were successful. Most graphs represent the collective data from multiple independent experiments and the number of replicates are given in figure legends. |
| Randomization   | For mouse experiments, animals of the same litters were randomly assigned and compared.                                                                                                |
| Blinding        | Investigators were blinded in the process of data collection, processing, and analysis.                                                                                                |

## Reporting for specific materials, systems and methods

We require information from authors about some types of materials, experimental systems and methods used in many studies. Here, indicate whether each material, system or method listed is relevant to your study. If you are not sure if a list item applies to your research, read the appropriate section before selecting a response.

### Materials & experimental systems

| n/a                                 | Included in the study                                           |
|-------------------------------------|-----------------------------------------------------------------|
| <input type="checkbox"/>            | <input checked="" type="checkbox"/> Antibodies                  |
| <input checked="" type="checkbox"/> | <input type="checkbox"/> Eukaryotic cell lines                  |
| <input checked="" type="checkbox"/> | <input type="checkbox"/> Palaeontology                          |
| <input type="checkbox"/>            | <input checked="" type="checkbox"/> Animals and other organisms |
| <input checked="" type="checkbox"/> | <input type="checkbox"/> Human research participants            |
| <input checked="" type="checkbox"/> | <input type="checkbox"/> Clinical data                          |

### Methods

| n/a                                 | Included in the study                           |
|-------------------------------------|-------------------------------------------------|
| <input checked="" type="checkbox"/> | <input type="checkbox"/> ChIP-seq               |
| <input checked="" type="checkbox"/> | <input type="checkbox"/> Flow cytometry         |
| <input checked="" type="checkbox"/> | <input type="checkbox"/> MRI-based neuroimaging |

## Antibodies

### Antibodies used

The following antibodies were used: Gfat1 (Santa Cruz Biotechnology, #sc-134894), GalE (Abcam, #ab155997), Gnpnat1 (Sigma, #HPA044647), Pgm3 (Sigma, #WH0005238M1), Uap1 (Sigma, #SAB1406469), GAPDH (Fitzgerald, #10R-G109A), p-Akt (Cell Signaling, #9271), Akt (Cell Signaling, #2920), mTOR (Cell Signaling, #4517), p-mTOR (Cell Signaling, #2974), S6 (Cell Signaling, #2217), p-S6 (Cell Signaling, #5364), 4EBP1 (Cell Signaling, #9644), p-4EBP1 (Cell Signaling, #2855), Anf (Abcam, #ab180649),  $\beta$ MHC (Abcam, #ab124205), RCAN1 (Sigma, #D6694), O-GlcNAc (ThermoFisher, MA1-072), IRDye 800 CW goat anti-rabbit secondary antibody (Li-Cor, #925-32211), and Alexa Fluor 700-conjugated goat anti-mouse secondary antibody (ThermoFisher, #A-21036). All primary antibodies were used at 1:1000. All secondary antibodies were used at 1:5000.

### Validation

Gfat1 antibodies were validated by using Gfat1 overexpression and knockdown primary cells, and Gfat1 overexpression mouse hearts.  
All other antibodies used in this study have also been validated. The information can be found on the manufacturer's websites as listed below.  
GalE (Abcam, #ab155997, clone number EPR11088[B]), <https://www.abcam.com/gale-antibody-epr11088b-ab155997.html>  
Gnpnat1 (Sigma, #HPA044647), <https://www.sigmaaldrich.com/catalog/product/sigma/hpa044647?lang=en&region=US>  
Pgm3 (Sigma, #WH0005238M1, clone 1E2-1B12), <https://www.sigmaaldrich.com/catalog/product/sigma/wh0005238m1?lang=en&region=US>  
Uap1 (Sigma, #SAB1406469), <https://www.sigmaaldrich.com/catalog/product/sigma/sab1406469?lang=en&region=US>  
GAPDH (Fitzgerald, #10R-G109A, clone 6C5), <https://www.fitzgerald-fii.com/gapdh-antibody-10r-g109a.html>  
p-Akt (Cell Signaling, #9271), <https://www.cellsignal.com/products/primary-antibodies/phospho-akt-ser473-antibody/9271>  
Akt (Cell Signaling, #2920, clone 40D4), <https://www.cellsignal.com/products/primary-antibodies/akt-pan-40d4-mouse-mab/2920>  
mTOR (Cell Signaling, #4517, clone L27D4), <https://www.cellsignal.com/products/primary-antibodies/mtor-l27d4-mouse-mab/4517>  
p-mTOR (Cell Signaling, #2974), <https://www.cellsignal.com/products/primary-antibodies/phospho-mtor-ser2481-antibody/2974>  
S6 (Cell Signaling, #2217, clone 5G10), <https://www.cellsignal.com/products/primary-antibodies/s6-ribosomal-protein-5g10->

rabbit-mab/2217

p-S6 (Cell Signaling, #5364, clone D68F8), <https://www.cellsignal.com/products/primary-antibodies/phospho-s6-ribosomal-protein-ser240-244-d68f8-xp-rabbit-mab/5364>

4EBP1 (Cell Signaling, #9644, clone 53H11), <https://www.cellsignal.com/products/primary-antibodies/4e-bp1-53h11-rabbit-mab/9644>

p-4EBP1 (Cell Signaling, #2855, clone 236B4), <https://www.cellsignal.com/products/primary-antibodies/phospho-4e-bp1-thr37-46-236b4-rabbit-mab/2855>

Anf (Abcam, #ab180649), <https://www.abcam.com/natriuretic-peptides-a-antibody-ab180649.html>

βMHC (Abcam, #ab124205), <https://www.abcam.com/heavy-chain-myosinmyh3-antibody-ab124205.html>

RCAN1 (Sigma, #D6694), <https://www.sigmaaldrich.com/catalog/product/sigma/d6694?lang=en&region=US>

O-GlcNAc (ThermoFisher, MA1-072, clone RL2), <https://www.thermofisher.com/antibody/product/O-linked-N-acetylglucosamine-O-GlcNAc-Antibody-clone-RL2-Monoclonal/MA1-072>

IRDye 800 CW goat anti-rabbit secondary antibody (Li-Cor, #925-32211), <https://www.licor.com/bio/reagents/irdye-800cw-goat-anti-rabbit-igg-secondary-antibody>

Alexa Fluor 700-conjugated goat anti-mouse secondary antibody (ThermoFisher, #A-21036), <https://www.thermofisher.com/antibody/product/Goat-anti-Mouse-IgG-H-L-Cross-Adsorbed-Secondary-Antibody-Polyclonal/A-21036>

## Animals and other organisms

Policy information about [studies involving animals](#); [ARRIVE guidelines](#) recommended for reporting animal research

|                         |                                                                                                                                                                                                                                                 |
|-------------------------|-------------------------------------------------------------------------------------------------------------------------------------------------------------------------------------------------------------------------------------------------|
| Laboratory animals      | This study involved mice. The strain information (C57BL/6) is described in the Methods section. Male mice were used for most experiments. The age of mice for all experiments is either stated in the figure legends or in the Methods section. |
| Wild animals            | No wild animals were used in this study.                                                                                                                                                                                                        |
| Field-collected samples | No field-collected samples were used in this study.                                                                                                                                                                                             |
| Ethics oversight        | All animal procedures have been approved by the Institutional Animal Care and Use Committee of University of Texas Southwestern Medical Center.                                                                                                 |

Note that full information on the approval of the study protocol must also be provided in the manuscript.
